# Supplementary material for: Segmentation of the prostate, its zones, anterior fibromuscular stroma, and urethra on the MRIs and multimodality image fusion using U-Net model
Source: PubMed Central journal article supplement — Quant Imaging Med Surg. 2022 Oct;12(10):4786–804. doi: 10.21037/qims-22-115 (PMC9511435; doi:10.21037/qims-22-115), 2022-10
Supplement: qims-12-10-4786-supplementary.pdf [file qims-12-10-4786-supplementary.pdf]

Table S1 Details of the proposed model

| Layer (type)                     | Output shape        | Param # | Connected to                                      |
|----------------------------------|---------------------|---------|---------------------------------------------------|
| data (InputLayer)                | (None, 160, 160, 1) | 0       |                                                   |
| bn_data (BatchNormalization)     | (None, 160, 160, 1) | 3       | data[0][0]                                        |
| zero_padding2d (ZeroPadding2D)   | (None, 166, 166, 1) | 0       | bn_data[0][0]                                     |
| conv0 (Conv2D)                   | (None, 80, 80, 64)  | 3136    | zero_padding2d[0][0]                              |
| bn0 (BatchNormalization)         | (None, 80, 80, 64)  | 256     | conv0[0][0]                                       |
| relu0 (Activation)               | (None, 80, 80, 64)  | 0       | bn0[0][0]                                         |
| zero_padding2d_1 (ZeroPadding2D) | (None, 82, 82, 64)  | 0       | relu0[0][0]                                       |
| pooling0 (MaxPooling2D)          | (None, 40, 40, 64)  | 0       | zero_padding2d_1[0][0]                            |
| stage1_unit1_bn1 (BatchNormaliz) | (None, 40, 40, 64)  | 256     | pooling0[0][0]                                    |
| stage1_unit1_relu1 (Activation)  | (None, 40, 40, 64)  | 0       | stage1_unit1_bn1[0][0]                            |
| zero_padding2d_2 (ZeroPadding2D) | (None, 42, 42, 64)  | 0       | stage1_unit1_relu1[0][0]                          |
| stage1_unit1_conv1 (Conv2D)      | (None, 40, 40, 64)  | 36864   | zero_padding2d_2[0][0]                            |
| stage1_unit1_bn2 (BatchNormaliz) | (None, 40, 40, 64)  | 256     | stage1_unit1_conv1[0][0]                          |
| stage1_unit1_relu2 (Activation)  | (None, 40, 40, 64)  | 0       | stage1_unit1_bn2[0][0]                            |
| zero_padding2d_3 (ZeroPadding2D) | (None, 42, 42, 64)  | 0       | stage1_unit1_relu2[0][0]                          |
| stage1_unit1_conv2 (Conv2D)      | (None, 40, 40, 64)  | 36864   | zero_padding2d_3[0][0]                            |
| stage1_unit1_sc (Conv2D)         | (None, 40, 40, 64)  | 4096    | stage1_unit1_relu1[0][0]                          |
| add (Add)                        | (None, 40, 40, 64)  | 0       | stage1_unit1_conv2[0][0]<br>stage1_unit1_sc[0][0] |
| stage1_unit2_bn1 (BatchNormaliz) | (None, 40, 40, 64)  | 256     | add[0][0]                                         |
| stage1_unit2_relu1 (Activation)  | (None, 40, 40, 64)  | 0       | stage1_unit2_bn1[0][0]                            |
| zero_padding2d_4 (ZeroPadding2D) | (None, 42, 42, 64)  | 0       | stage1_unit2_relu1[0][0]                          |
| stage1_unit2_conv1 (Conv2D)      | (None, 40, 40, 64)  | 36864   | zero_padding2d_4[0][0]                            |
| stage1_unit2_bn2 (BatchNormaliz) | (None, 40, 40, 64)  | 256     | stage1_unit2_conv1[0][0]                          |
| stage1_unit2_relu2 (Activation)  | (None, 40, 40, 64)  | 0       | stage1_unit2_bn2[0][0]                            |
| zero_padding2d_5 (ZeroPadding2D) | (None, 42, 42, 64)  | 0       | stage1_unit2_relu2[0][0]                          |
| stage1_unit2_conv2 (Conv2D)      | (None, 40, 40, 64)  | 36864   | zero_padding2d_5[0][0]                            |
| add_1 (Add)                      | (None, 40, 40, 64)  | 0       | stage1_unit2_conv2[0][0]<br>add[0][0]             |
| stage1_unit3_bn1 (BatchNormaliz) | (None, 40, 40, 64)  | 256     | add_1[0][0]                                       |
| stage1_unit3_relu1 (Activation)  | (None, 40, 40, 64)  | 0       | stage1_unit3_bn1[0][0]                            |
| zero_padding2d_6 (ZeroPadding2D) | (None, 42, 42, 64)  | 0       | stage1_unit3_relu1[0][0]                          |
| stage1_unit3_conv1 (Conv2D)      | (None, 40, 40, 64)  | 36864   | zero_padding2d_6[0][0]                            |
| stage1_unit3_bn2 (BatchNormaliz) | (None, 40, 40, 64)  | 256     | stage1_unit3_conv1[0][0]                          |
| stage1_unit3_relu2 (Activation)  | (None, 40, 40, 64)  | 0       | stage1_unit3_bn2[0][0]                            |
| zero_padding2d_7 (ZeroPadding2D) | (None, 42, 42, 64)  | 0       | stage1_unit3_relu2[0][0]                          |
| stage1_unit3_conv2 (Conv2D)      | (None, 40, 40, 64)  | 36864   | zero_padding2d_7[0][0]                            |
| add_2 (Add)                      | (None, 40, 40, 64)  | 0       | stage1_unit3_conv2[0][0]<br>add_1[0][0]           |
| stage2_unit1_bn1 (BatchNormaliz) | (None, 40, 40, 64)  | 256     | add_2[0][0]                                       |
| stage2_unit1_relu1 (Activation)  | (None, 40, 40, 64)  | 0       | stage2_unit1_bn1[0][0]                            |
| zero_padding2d_8 (ZeroPadding2D) | (None, 42, 42, 64)  | 0       | stage2_unit1_relu1[0][0]                          |
| stage2_unit1_conv1 (Conv2D)      | (None, 20, 20, 128) | 73728   | zero_padding2d_8[0][0]                            |
| stage2_unit1_bn2 (BatchNormaliz) | (None, 20, 20, 128) | 512     | stage2_unit1_conv1[0][0]                          |
| stage2_unit1_relu2 (Activation)  | (None, 20, 20, 128) | 0       | stage2_unit1_bn2[0][0]                            |
| zero_padding2d_9 (ZeroPadding2D) | (None, 22, 22, 128) | 0       | stage2_unit1_relu2[0][0]                          |
| stage2_unit1_conv2 (Conv2D)      | (None, 20, 20, 128) | 147456  | zero_padding2d_9[0][0]                            |
| stage2_unit1_sc (Conv2D)         | (None, 20, 20, 128) | 8192    | stage2_unit1_relu1[0][0]                          |
| add_3 (Add)                      | (None, 20, 20, 128) | 0       | stage2_unit1_conv2[0][0]<br>stage2_unit1_sc[0][0] |
| stage2_unit2_bn1 (BatchNormaliz) | (None, 20, 20, 128) | 512     | add_3[0][0]                                       |
| stage2_unit2_relu1 (Activation)  | (None, 20, 20, 128) | 0       | stage2_unit2_bn1[0][0]                            |
| zero_padding2d_10 (ZeroPadding2) | (None, 22, 22, 128) | 0       | stage2_unit2_relu1[0][0]                          |
| stage2_unit2_conv1 (Conv2D)      | (None, 20, 20, 128) | 147456  | zero_padding2d_10[0][0]                           |
| stage2_unit2_bn2 (BatchNormaliz) | (None, 20, 20, 128) | 512     | stage2_unit2_conv1[0][0]                          |
| stage2_unit2_relu2 (Activation)  | (None, 20, 20, 128) | 0       | stage2_unit2_bn2[0][0]                            |
| zero_padding2d_11 (ZeroPadding2) | (None, 22, 22, 128) | 0       | stage2_unit2_relu2[0][0]                          |
| stage2_unit2_conv2 (Conv2D)      | (None, 20, 20, 128) | 147456  | zero_padding2d_11[0][0]                           |
| add_4 (Add)                      | (None, 20, 20, 128) | 0       | stage2_unit2_conv2[0][0]<br>add_3[0][0]           |
| stage2_unit3_bn1 (BatchNormaliz) | (None, 20, 20, 128) | 512     | add_4[0][0]                                       |
| stage2_unit3_relu1 (Activation)  | (None, 20, 20, 128) | 0       | stage2_unit3_bn1[0][0]                            |
| zero_padding2d_12 (ZeroPadding2) | (None, 22, 22, 128) | 0       | stage2_unit3_relu1[0][0]                          |
| stage2_unit3_conv1 (Conv2D)      | (None, 20, 20, 128) | 147456  | zero_padding2d_12[0][0]                           |
| stage2_unit3_bn2 (BatchNormaliz) | (None, 20, 20, 128) | 512     | stage2_unit3_conv1[0][0]                          |
| stage2_unit3_relu2 (Activation)  | (None, 20, 20, 128) | 0       | stage2_unit3_bn2[0][0]                            |
| zero_padding2d_13 (ZeroPadding2) | (None, 22, 22, 128) | 0       | stage2_unit3_relu2[0][0]                          |
| stage2_unit3_conv2 (Conv2D)      | (None, 20, 20, 128) | 147456  | zero_padding2d_13[0][0]                           |
| add_5 (Add)                      | (None, 20, 20, 128) | 0       | stage2_unit3_conv2[0][0]<br>add_4[0][0]           |
| stage2_unit4_bn1 (BatchNormaliz) | (None, 20, 20, 128) | 512     | add_5[0][0]                                       |
| stage2_unit4_relu1 (Activation)  | (None, 20, 20, 128) | 0       | stage2_unit4_bn1[0][0]                            |
| zero_padding2d_14 (ZeroPadding2) | (None, 22, 22, 128) | 0       | stage2_unit4_relu1[0][0]                          |
| stage2_unit4_conv1 (Conv2D)      | (None, 20, 20, 128) | 147456  | zero_padding2d_14[0][0]                           |
| stage2_unit4_bn2 (BatchNormaliz) | (None, 20, 20, 128) | 512     | stage2_unit4_conv1[0][0]                          |
| stage2_unit4_relu2 (Activation)  | (None, 20, 20, 128) | 0       | stage2_unit4_bn2[0][0]                            |
| zero_padding2d_15 (ZeroPadding2) | (None, 22, 22, 128) | 0       | stage2_unit4_relu2[0][0]                          |
| stage2_unit4_conv2 (Conv2D)      | (None, 20, 20, 128) | 147456  | zero_padding2d_15[0][0]                           |
| add_6 (Add)                      | (None, 20, 20, 128) | 0       | stage2_unit4_conv2[0][0]<br>add_5[0][0]           |
| stage3_unit1_bn1 (BatchNormaliz) | (None, 20, 20, 128) | 512     | add_6[0][0]                                       |
| stage3_unit1_relu1 (Activation)  | (None, 20, 20, 128) | 0       | stage3_unit1_bn1[0][0]                            |
| zero_padding2d_16 (ZeroPadding2) | (None, 22, 22, 128) | 0       | stage3_unit1_relu1[0][0]                          |
| stage3_unit1_conv1 (Conv2D)      | (None, 10, 10, 256) | 294912  | zero_padding2d_16[0][0]                           |
| stage3_unit1_bn2 (BatchNormaliz) | (None, 10, 10, 256) | 1024    | stage3_unit1_conv1[0][0]                          |
| stage3_unit1_relu2 (Activation)  | (None, 10, 10, 256) | 0       | stage3_unit1_bn2[0][0]                            |
| zero_padding2d_17 (ZeroPadding2) | (None, 12, 12, 256) | 0       | stage3_unit1_relu2[0][0]                          |
| stage3_unit1_conv2 (Conv2D)      | (None, 10, 10, 256) | 589824  | zero_padding2d_17[0][0]                           |
| stage3_unit1_sc (Conv2D)         | (None, 10, 10, 256) | 32768   | stage3_unit1_relu1[0][0]                          |
| add_7 (Add)                      | (None, 10, 10, 256) | 0       | stage3_unit1_conv2[0][0]<br>stage3_unit1_sc[0][0] |
| stage3_unit2_bn1 (BatchNormaliz) | (None, 10, 10, 256) | 1024    | add_7[0][0]                                       |
| stage3_unit2_relu1 (Activation)  | (None, 10, 10, 256) | 0       | stage3_unit2_bn1[0][0]                            |
| zero_padding2d_18 (ZeroPadding2) | (None, 12, 12, 256) | 0       | stage3_unit2_relu1[0][0]                          |
| stage3_unit2_conv1 (Conv2D)      | (None, 10, 10, 256) | 589824  | zero_padding2d_18[0][0]                           |
| stage3_unit2_bn2 (BatchNormaliz) | (None, 10, 10, 256) | 1024    | stage3_unit2_conv1[0][0]                          |
| stage3_unit2_relu2 (Activation)  | (None, 10, 10, 256) | 0       | stage3_unit2_bn2[0][0]                            |
| zero_padding2d_19 (ZeroPadding2) | (None, 12, 12, 256) | 0       | stage3_unit2_relu2[0][0]                          |
| stage3_unit2_conv2 (Conv2D)      | (None, 10, 10, 256) | 589824  | zero_padding2d_19[0][0]                           |
| add_8 (Add)                      | (None, 10, 10, 256) | 0       | stage3_unit2_conv2[0][0]<br>add_7[0][0]           |
| stage3_unit3_bn1 (BatchNormaliz) | (None, 10, 10, 256) | 1024    | add_8[0][0]                                       |
| stage3_unit3_relu1 (Activation)  | (None, 10, 10, 256) | 0       | stage3_unit3_bn1[0][0]                            |
| zero_padding2d_20 (ZeroPadding2) | (None, 12, 12, 256) | 0       | stage3_unit3_relu1[0][0]                          |
| stage3_unit3_conv1 (Conv2D)      | (None, 10, 10, 256) | 589824  | zero_padding2d_20[0][0]                           |
| stage3_unit3_bn2 (BatchNormaliz) | (None, 10, 10, 256) | 1024    | stage3_unit3_conv1[0][0]                          |
| stage3_unit3_relu2 (Activation)  | (None, 10, 10, 256) | 0       | stage3_unit3_bn2[0][0]                            |
| zero_padding2d_21 (ZeroPadding2) | (None, 12, 12, 256) | 0       | stage3_unit3_relu2[0][0]                          |
| stage3_unit3_conv2 (Conv2D)      | (None, 10, 10, 256) | 589824  | zero_padding2d_21[0][0]                           |
| add_9 (Add)                      | (None, 10, 10, 256) | 0       | stage3_unit3_conv2[0][0]<br>add_8[0][0]           |

Table S1 (continued)

Table S1 (continued)

| Layer (type)                      | Output Shape         | Param # | Connected to                                                |
|-----------------------------------|----------------------|---------|-------------------------------------------------------------|
| stage3_unit4_bn1 (BatchNormaliz)  | (None, 10, 10, 256)  | 1024    | add_9[0][0]                                                 |
| stage3_unit4_relu1 (Activation)   | (None, 10, 10, 256)  | 0       | stage3_unit4_bn1[0][0]                                      |
| zero_padding2d_22 (ZeroPadding2)  | (None, 12, 12, 256)  | 0       | stage3_unit4_relu1[0][0]                                    |
| stage3_unit4_conv1 (Conv2D)       | (None, 10, 10, 256)  | 589824  | zero_padding2d_22[0][0]                                     |
| stage3_unit4_bn2 (BatchNormaliz)  | (None, 10, 10, 256)  | 1024    | stage3_unit4_conv1[0][0]                                    |
| stage3_unit4_relu2 (Activation)   | (None, 10, 10, 256)  | 0       | stage3_unit4_bn2[0][0]                                      |
| zero_padding2d_23 (ZeroPadding2)  | (None, 12, 12, 256)  | 0       | stage3_unit4_relu2[0][0]                                    |
| stage3_unit4_conv2 (Conv2D)       | (None, 10, 10, 256)  | 589824  | zero_padding2d_23[0][0]                                     |
| add_10 (Add)                      | (None, 10, 10, 256)  | 0       | stage3_unit4_conv2[0][0]<br>add_9[0][0]                     |
| stage3_unit5_bn1 (BatchNormaliz)  | (None, 10, 10, 256)  | 1024    | add_10[0][0]                                                |
| stage3_unit5_relu1 (Activation)   | (None, 10, 10, 256)  | 0       | stage3_unit5_bn1[0][0]                                      |
| zero_padding2d_24 (ZeroPadding2)  | (None, 12, 12, 256)  | 0       | stage3_unit5_relu1[0][0]                                    |
| stage3_unit5_conv1 (Conv2D)       | (None, 10, 10, 256)  | 589824  | zero_padding2d_24[0][0]                                     |
| stage3_unit5_bn2 (BatchNormaliz)  | (None, 10, 10, 256)  | 1024    | stage3_unit5_conv1[0][0]                                    |
| stage3_unit5_relu2 (Activation)   | (None, 10, 10, 256)  | 0       | stage3_unit5_bn2[0][0]                                      |
| zero_padding2d_25 (ZeroPadding2)  | (None, 12, 12, 256)  | 0       | stage3_unit5_relu2[0][0]                                    |
| stage3_unit5_conv2 (Conv2D)       | (None, 10, 10, 256)  | 589824  | zero_padding2d_25[0][0]                                     |
| add_11 (Add)                      | (None, 10, 10, 256)  | 0       | stage3_unit5_conv2[0][0]<br>add_10[0][0]                    |
| stage3_unit6_bn1 (BatchNormaliz)  | (None, 10, 10, 256)  | 1024    | add_11[0][0]                                                |
| stage3_unit6_relu1 (Activation)   | (None, 10, 10, 256)  | 0       | stage3_unit6_bn1[0][0]                                      |
| zero_padding2d_26 (ZeroPadding2)  | (None, 12, 12, 256)  | 0       | stage3_unit6_relu1[0][0]                                    |
| stage3_unit6_conv1 (Conv2D)       | (None, 10, 10, 256)  | 589824  | zero_padding2d_26[0][0]                                     |
| stage3_unit6_bn2 (BatchNormaliz)  | (None, 10, 10, 256)  | 1024    | stage3_unit6_conv1[0][0]                                    |
| stage3_unit6_relu2 (Activation)   | (None, 10, 10, 256)  | 0       | stage3_unit6_bn2[0][0]                                      |
| zero_padding2d_27 (ZeroPadding2)  | (None, 12, 12, 256)  | 0       | stage3_unit6_relu2[0][0]                                    |
| stage3_unit6_conv2 (Conv2D)       | (None, 10, 10, 256)  | 589824  | zero_padding2d_27[0][0]                                     |
| add_12 (Add)                      | (None, 10, 10, 256)  | 0       | stage3_unit6_conv2[0][0]<br>add_11[0][0]                    |
| stage4_unit1_bn1 (BatchNormaliz)  | (None, 10, 10, 256)  | 1024    | add_12[0][0]                                                |
| stage4_unit1_relu1 (Activation)   | (None, 10, 10, 256)  | 0       | stage4_unit1_bn1[0][0]                                      |
| zero_padding2d_28 (ZeroPadding2)  | (None, 12, 12, 256)  | 0       | stage4_unit1_relu1[0][0]                                    |
| stage4_unit1_conv1 (Conv2D)       | (None, 5, 5, 512)    | 1179648 | zero_padding2d_28[0][0]                                     |
| stage4_unit1_bn2 (BatchNormaliz)  | (None, 5, 5, 512)    | 2048    | stage4_unit1_conv1[0][0]                                    |
| stage4_unit1_relu2 (Activation)   | (None, 5, 5, 512)    | 0       | stage4_unit1_bn2[0][0]                                      |
| zero_padding2d_29 (ZeroPadding2)  | (None, 7, 7, 512)    | 0       | stage4_unit1_relu2[0][0]                                    |
| stage4_unit1_conv2 (Conv2D)       | (None, 5, 5, 512)    | 2359296 | zero_padding2d_29[0][0]                                     |
| stage4_unit1_sc (Conv2D)          | (None, 5, 5, 512)    | 131072  | stage4_unit1_relu1[0][0]                                    |
| add_13 (Add)                      | (None, 5, 5, 512)    | 0       | stage4_unit1_conv2[0][0]<br>stage4_unit1_sc[0][0]           |
| stage4_unit2_bn1 (BatchNormaliz)  | (None, 5, 5, 512)    | 2048    | add_13[0][0]                                                |
| stage4_unit2_relu1 (Activation)   | (None, 5, 5, 512)    | 0       | stage4_unit2_bn1[0][0]                                      |
| zero_padding2d_30 (ZeroPadding2)  | (None, 7, 7, 512)    | 0       | stage4_unit2_relu1[0][0]                                    |
| stage4_unit2_conv1 (Conv2D)       | (None, 5, 5, 512)    | 2359296 | zero_padding2d_30[0][0]                                     |
| stage4_unit2_bn2 (BatchNormaliz)  | (None, 5, 5, 512)    | 2048    | stage4_unit2_conv1[0][0]                                    |
| stage4_unit2_relu2 (Activation)   | (None, 5, 5, 512)    | 0       | stage4_unit2_bn2[0][0]                                      |
| zero_padding2d_31 (ZeroPadding2)  | (None, 7, 7, 512)    | 0       | stage4_unit2_relu2[0][0]                                    |
| stage4_unit2_conv2 (Conv2D)       | (None, 5, 5, 512)    | 2359296 | zero_padding2d_31[0][0]                                     |
| add_14 (Add)                      | (None, 5, 5, 512)    | 0       | stage4_unit2_conv2[0][0]<br>add_13[0][0]                    |
| stage4_unit3_bn1 (BatchNormaliz)  | (None, 5, 5, 512)    | 2048    | add_14[0][0]                                                |
| stage4_unit3_relu1 (Activation)   | (None, 5, 5, 512)    | 0       | stage4_unit3_bn1[0][0]                                      |
| zero_padding2d_32 (ZeroPadding2)  | (None, 7, 7, 512)    | 0       | stage4_unit3_relu1[0][0]                                    |
| stage4_unit3_conv1 (Conv2D)       | (None, 5, 5, 512)    | 2359296 | zero_padding2d_32[0][0]                                     |
| stage4_unit3_bn2 (BatchNormaliz)  | (None, 5, 5, 512)    | 2048    | stage4_unit3_conv1[0][0]                                    |
| stage4_unit3_relu2 (Activation)   | (None, 5, 5, 512)    | 0       | stage4_unit3_bn2[0][0]                                      |
| zero_padding2d_33 (ZeroPadding2)  | (None, 7, 7, 512)    | 0       | stage4_unit3_relu2[0][0]                                    |
| stage4_unit3_conv2 (Conv2D)       | (None, 5, 5, 512)    | 2359296 | zero_padding2d_33[0][0]                                     |
| add_15 (Add)                      | (None, 5, 5, 512)    | 0       | stage4_unit3_conv2[0][0]<br>add_14[0][0]                    |
| bn1 (BatchNormalization)          | (None, 5, 5, 512)    | 2048    | add_15[0][0]                                                |
| relu1 (Activation)                | (None, 5, 5, 512)    | 0       | bn1[0][0]                                                   |
| decoder_stage0_upsampling (UpSa)  | (None, 10, 10, 512)  | 0       | relu1[0][0]                                                 |
| decoder_stage0_concat (Concaten)  | (None, 10, 10, 768)  | 0       | decoder_stage0_upsampling[0][0]<br>stage4_unit1_relu1[0][0] |
| decoder_stage0a_conv (Conv2D)     | (None, 10, 10, 256)  | 1769472 | decoder_stage0_concat[0][0]                                 |
| decoder_stage0a_bn (BatchNormal)  | (None, 10, 10, 256)  | 1024    | decoder_stage0a_conv[0][0]                                  |
| decoder_stage0a_relu (Activation) | (None, 10, 10, 256)  | 0       | decoder_stage0a_bn[0][0]                                    |
| decoder_stage0b_conv (Conv2D)     | (None, 10, 10, 256)  | 589824  | decoder_stage0a_relu[0][0]                                  |
| decoder_stage0b_bn (BatchNormal)  | (None, 10, 10, 256)  | 1024    | decoder_stage0b_conv[0][0]                                  |
| decoder_stage0b_relu (Activation) | (None, 10, 10, 256)  | 0       | decoder_stage0b_bn[0][0]                                    |
| decoder_stage1_upsampling (UpSa)  | (None, 20, 20, 256)  | 0       | decoder_stage0b_relu[0][0]                                  |
| decoder_stage1_concat (Concaten)  | (None, 20, 20, 384)  | 0       | decoder_stage1_upsampling[0][0]<br>stage3_unit1_relu1[0][0] |
| decoder_stage1a_conv (Conv2D)     | (None, 20, 20, 128)  | 442368  | decoder_stage1_concat[0][0]                                 |
| decoder_stage1a_bn (BatchNormal)  | (None, 20, 20, 128)  | 512     | decoder_stage1a_conv[0][0]                                  |
| decoder_stage1a_relu (Activation) | (None, 20, 20, 128)  | 0       | decoder_stage1a_bn[0][0]                                    |
| decoder_stage1b_conv (Conv2D)     | (None, 20, 20, 128)  | 147456  | decoder_stage1a_relu[0][0]                                  |
| decoder_stage1b_bn (BatchNormal)  | (None, 20, 20, 128)  | 512     | decoder_stage1b_conv[0][0]                                  |
| decoder_stage1b_relu (Activation) | (None, 20, 20, 128)  | 0       | decoder_stage1b_bn[0][0]                                    |
| decoder_stage2_upsampling (UpSa)  | (None, 40, 40, 128)  | 0       | decoder_stage1b_relu[0][0]                                  |
| decoder_stage2_concat (Concaten)  | (None, 40, 40, 192)  | 0       | decoder_stage2_upsampling[0][0]<br>stage2_unit1_relu1[0][0] |
| decoder_stage2a_conv (Conv2D)     | (None, 40, 40, 64)   | 110592  | decoder_stage2_concat[0][0]                                 |
| decoder_stage2a_bn (BatchNormal)  | (None, 40, 40, 64)   | 256     | decoder_stage2a_conv[0][0]                                  |
| decoder_stage2a_relu (Activation) | (None, 40, 40, 64)   | 0       | decoder_stage2a_bn[0][0]                                    |
| decoder_stage2b_conv (Conv2D)     | (None, 40, 40, 64)   | 36864   | decoder_stage2a_relu[0][0]                                  |
| decoder_stage2b_bn (BatchNormal)  | (None, 40, 40, 64)   | 256     | decoder_stage2b_conv[0][0]                                  |
| decoder_stage2b_relu (Activation) | (None, 40, 40, 64)   | 0       | decoder_stage2b_bn[0][0]                                    |
| decoder_stage3_upsampling (UpSa)  | (None, 80, 80, 64)   | 0       | decoder_stage2b_relu[0][0]                                  |
| decoder_stage3_concat (Concaten)  | (None, 80, 80, 128)  | 0       | decoder_stage3_upsampling[0][0]<br>relu0[0][0]              |
| decoder_stage3a_conv (Conv2D)     | (None, 80, 80, 32)   | 36864   | decoder_stage3_concat[0][0]                                 |
| decoder_stage3a_bn (BatchNormal)  | (None, 80, 80, 32)   | 128     | decoder_stage3a_conv[0][0]                                  |
| decoder_stage3a_relu (Activation) | (None, 80, 80, 32)   | 0       | decoder_stage3a_bn[0][0]                                    |
| decoder_stage3b_conv (Conv2D)     | (None, 80, 80, 32)   | 9216    | decoder_stage3a_relu[0][0]                                  |
| decoder_stage3b_bn (BatchNormal)  | (None, 80, 80, 32)   | 128     | decoder_stage3b_conv[0][0]                                  |
| decoder_stage3b_relu (Activation) | (None, 80, 80, 32)   | 0       | decoder_stage3b_bn[0][0]                                    |
| decoder_stage4_upsampling (UpSa)  | (None, 160, 160, 32) | 0       | decoder_stage3b_relu[0][0]                                  |
| decoder_stage4a_conv (Conv2D)     | (None, 160, 160, 16) | 4608    | decoder_stage4_upsampling[0][0]                             |
| decoder_stage4a_bn (BatchNormal)  | (None, 160, 160, 16) | 64      | decoder_stage4a_conv[0][0]                                  |
| decoder_stage4a_relu (Activation) | (None, 160, 160, 16) | 0       | decoder_stage4a_bn[0][0]                                    |
| decoder_stage4b_conv (Conv2D)     | (None, 160, 160, 16) | 2304    | decoder_stage4a_relu[0][0]                                  |
| decoder_stage4b_bn (BatchNormal)  | (None, 160, 160, 16) | 64      | decoder_stage4b_conv[0][0]                                  |
| decoder_stage4b_relu (Activation) | (None, 160, 160, 16) | 0       | decoder_stage4b_bn[0][0]                                    |
| final_conv (Conv2D)               | (None, 160, 160, 5)  | 725     | decoder_stage4b_relu[0][0]                                  |
| softmax (Activation)              | (None, 160, 160, 5)  | 0       | final_conv[0][0]                                            |
